# Supplementary material for: Branched Poly(ε-caprolactone)-Based Copolyesters of Different Architectures and Their Use in the Preparation of Anticancer Drug-Loaded Nanoparticles
Source: MDPI journal article supplement (doi:10.3390/ijms232315393), 2022-12-06
Supplement: s1 [file s1]

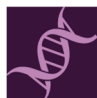

Article

# Branched Poly(*E*-Caprolactone)-Based Copolyesters of Different Architectures And Their Use IN the Preparation of Anticancer Drug-Loaded Nanoparticles

Evi Christodoulou <sup>1</sup>, Maria Notopoulou <sup>1</sup>, Eirini Nakiou <sup>1</sup>, Margaritis Kostoglou <sup>2</sup>, Panagiotis Barmpalexis <sup>3</sup> and Dimitrios N. Bikiaris <sup>1,\*</sup>

<sup>1</sup> Laboratory of Polymer Chemistry and Technology, Department of Chemistry, Aristotle University of Thessaloniki, Thessaloniki 54124, Greece; evicius@gmail.com (E.C.); marynoto@hotmail.com (M.N.); renia.nakiou@hotmail.com (R.N.); dbic@chem.auth.gr (D.N.B.)

<sup>2</sup> Laboratory of General and Inorganic Chemical Technology, Department of Chemistry, Aristotle University of Thessaloniki, Thessaloniki 54124, Greece; kostoglu@chem.auth.gr (M.K.)

<sup>3</sup> Department of Pharmaceutical Technology, School of Pharmacy, Aristotle University of Thessaloniki, Thessaloniki 54124, Greece; pbarm@pharm.auth.gr (P.B.)

\* Correspondence: dbic@chem.auth.gr; Tel. +30 2310 997812 (D.N.B.)

## SUPPLEMENTARY INFORMATION

### 1. Molecular weight estimation

The molecular weights of the copolymers were estimated by Gel Permeation Chromatography/Size Exclusion Chromatography (GPC/SEC). The analysis was performed by means of a GPC/SEC equipment composed of a Waters 600 high pressure liquid chromatographic pump, Waters Ultrastaygel columns (HR-1, HR-2, HR-4, HR-5), and a Shimadzu RID-10A refractive index detector. Column calibration was performed using polystyrene standards (M<sub>w</sub> 1–300k). The concentration of the prepared solutions was 10 mg/700 µL, the injection volume was 200 µL and the flow rate 1 mL/min.

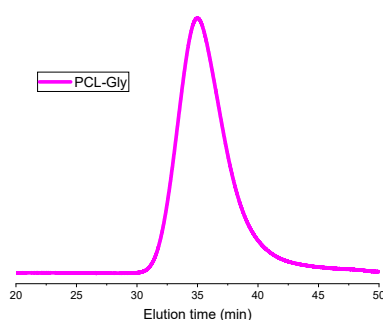

(a)

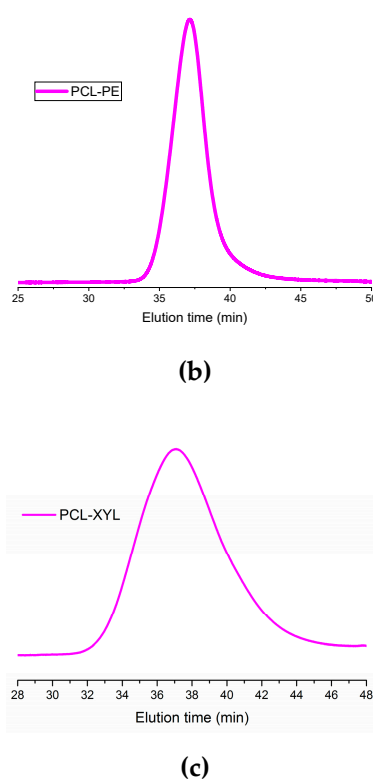

**Figure S1.** Size-exclusion (SEC) chromatograms of the prepared copolyesters.

## 2. Nanoparticles size determination

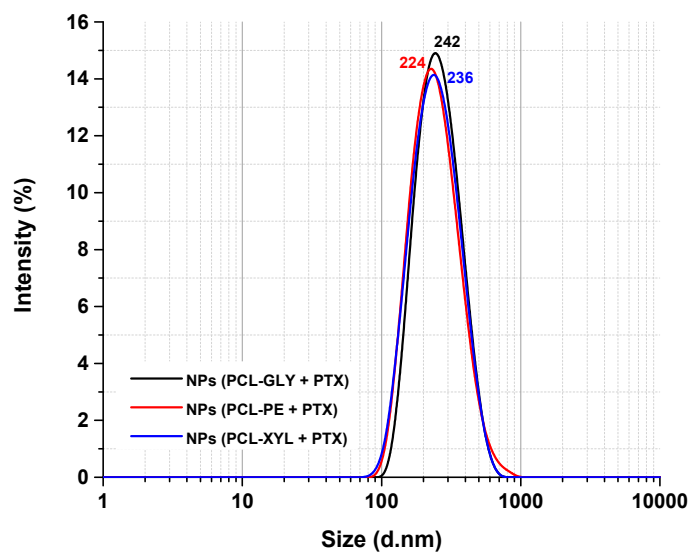

**Figure S2.** Particle size measurements by dynamic light scattering measurements.
